# Supplementary material
Source: PubMed Central journal article supplement (PMC7704697)
Supplement: NIHMS1624031-supplement-1.pdf [file NIHMS1624031-supplement-1.pdf]

**Supplementary Figure 1. FACS gating strategies for human lung and peripheral blood cells.** **a**, Sequential FACS data and sorting gates (red) for dissociated human lung cells from subject sample D1b (plate B001223) following MACS depletion of highly abundant immune (CD45<sup>+</sup>) and endothelial (CD31<sup>+</sup>) cells. The final sort (right) was of viable single cells from the lung epithelial (EPCAM<sup>+</sup>CD45<sup>-</sup>), immune (CD45<sup>+</sup>EPCAM<sup>-</sup>), and stromal/endothelial (EPCAM<sup>-</sup>CD45<sup>-</sup>) compartments into 384-well plates for SS2 scRNAseq. Plots are representative of FACS repeated on 3 subjects used for scRNAseq. **b**, Sequential FACS data and sorting gates (red) for white blood cells isolated on a Ficoll gradient of matched subject peripheral blood (subject 1, plate BP1). Viable, single CD235a<sup>-</sup> (non-RBC) cells were captured without additional gating (panel 4), or further sorted as CD8 T (CD8<sup>+</sup>; panel 8), CD4 T (CD4<sup>+</sup>; panel 7), B (CD19<sup>+</sup>CD3<sup>-</sup>; panel 6), NK (CD19<sup>-</sup>CD3<sup>-</sup>CD56<sup>+</sup>CD14<sup>-</sup>; panel 9), or CD14<sup>+</sup> monocytes (CD19<sup>-</sup>CD3<sup>-</sup>CD56<sup>-</sup>CD14<sup>+</sup>; panel 9) for SS2 scRNAseq. Contours, 5% increments in cell density. Sorting on blood cells was done only for subject 1.

**Supplementary Table 1. Canonical cell types (45) in the human lung and their abundances, markers, and available expression data.** **a**, numbers of each type were calculated with their abundances and the total number of lung cells (estimated by comparing volume of lungs to the whole body). **b**, Canonical markers were obtained from referenced expression data or commonly used markers in the literature. **c**, Expression profiles captured immediately following tissue dissociation are considered primary. **d**, Alveoli were assumed to occupy ~90% of the total lung volume for all estimations. **e**, Inferred from mean relative abundance in proximal, medial and distal airway epithelium. **f**, Calculated by stereology **g**, Resin casts showed similar surface area of arteries and veins. **h**, Vascular smooth muscle is estimated to be slightly more abundant than airway smooth muscle. **i**, abundance of a more general cell type was split evenly. **j**, inferred from impression of light or electron microscopy. **k**, inferred from histological abundance in non-perfused healthy tissue. **l**, inferred from abundance among immune cells with FACS. **m**, Calculated using microfluidic capture.

**Supplementary Table 2. Human lung cell cluster identities, abundances, and locations.** Cell numbers are stratified by type, subject, and sequencing technology. Cell abbreviations indicated are used throughout.

**Supplementary Table 3. Surface markers used to isolate canonical immune cell types in bulk mRNA sequencing.** See Methods for details on antibodies.

**Supplementary Table 4. Enriched markers found in each cluster, with transcription factors, receptors/ligands, and disease associated genes annotated.** Includes all enriched genes for each type (p-val > 0.05, MAST, downsampled cells per group to 100 for SS2 clusters or 500 for 10x clusters). Abbreviations: avg\_logFC, the natural log of the average fold change between the cell type and other cell types in its tissue compartment; pct\_in\_cluster, percentage of cells within the cluster that express the gene; pct\_out\_cluster, percentage of cells outside cluster that express the gene; p\_val\_adj, p-value with Bonferroni correction applied; TF, transcription factor; OMIM, Online Mendelian Inheritance in Man; GWAS, genome wide association study.

**Supplementary Table 5. P-value and scores of each CellPhoneDB Receptor-Ligand interaction from each cluster.** Expression scores are given for significant (p > 0.1,

CellPhoneDB statistical framework) pairwise interactions between all SS2 cells (cell numbers given in Supplementary Table 2). Table includes all 1,085 receptor-ligand pairs and all pairwise cell type combinations. Abbreviations: partner\_a, cellphonedb ID for the first interaction partner protein; partner\_b, cellphonedb ID for the second interaction partner protein; source, reference from cellphonedb; secreted, whether the ligand is secreted or membrane bound; is\_integrin, whether the interaction includes an integrin complex.

**Supplementary Table 6. Mouse lung cell cluster identities and their abundances in each dataset.** Cell numbers are stratified by type, mouse, and sequencing technology. Mouse-specific molecular markers are indicated.

**Supplementary Table 7. Genes specific to mouse and human in each cluster and lung wide.** Includes all differentially expressed genes (p-val > 0.05, MAST) for all SS2 cells in indicated mouse and human clusters (human and mouse cell numbers given in Supplementary Tables 2 and 6, respectively). Abbreviations: avg\_logFC, the natural log of the average fold change between the mouse and human cell type indicated; pct\_mouse, percentage of mouse cells within the cluster that express the gene; pct\_human, percentage of human cells within the cluster that express the gene; p\_val\_adj, p-value with Bonferroni correction applied; enriched, gene is enriched in cluster in mouse or human.

**Supplementary Table 8. Evolutionary changes in cellular patterns of lung gene expression between mouse and human SS2 cells.** Numbers of genes and percentages are mean ( $\pm$ SEM) from using a median expression cutoff minus 0 to 2 standard deviations (0.25 increments) and a median percent cutoff plus 0 to 2 standard deviations (0.25 increments). Human and mouse cell numbers given in Supplementary Tables 2 and 6, respectively

**Supplementary Table 9. Evolutionary and functional classes of genes. Includes genes conserved between mouse and human.** Abbreviations: Evo type, evolutionary scenario gene falls into, with NA for genes not expressed; Gene class, type of gene (receptor, ligand, enzyme, transcription factor, etc); conserved clusters, number of homologous clusters gene where gene is expressed in both mouse and human; Human specific clusters, number of homologous clusters where the gene is only expressed in human; Mouse specific clusters, above for mouse.
