# Supplementary material
Source: PubMed Central journal article supplement (PMC7704697)

**a** Human lung

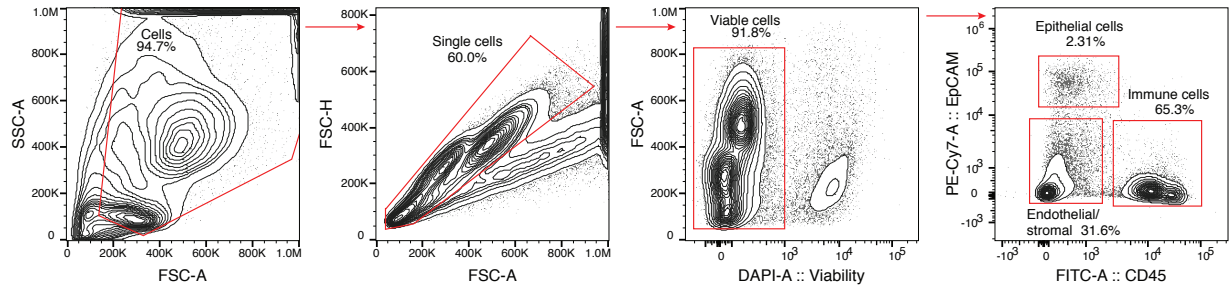

**b** Human blood

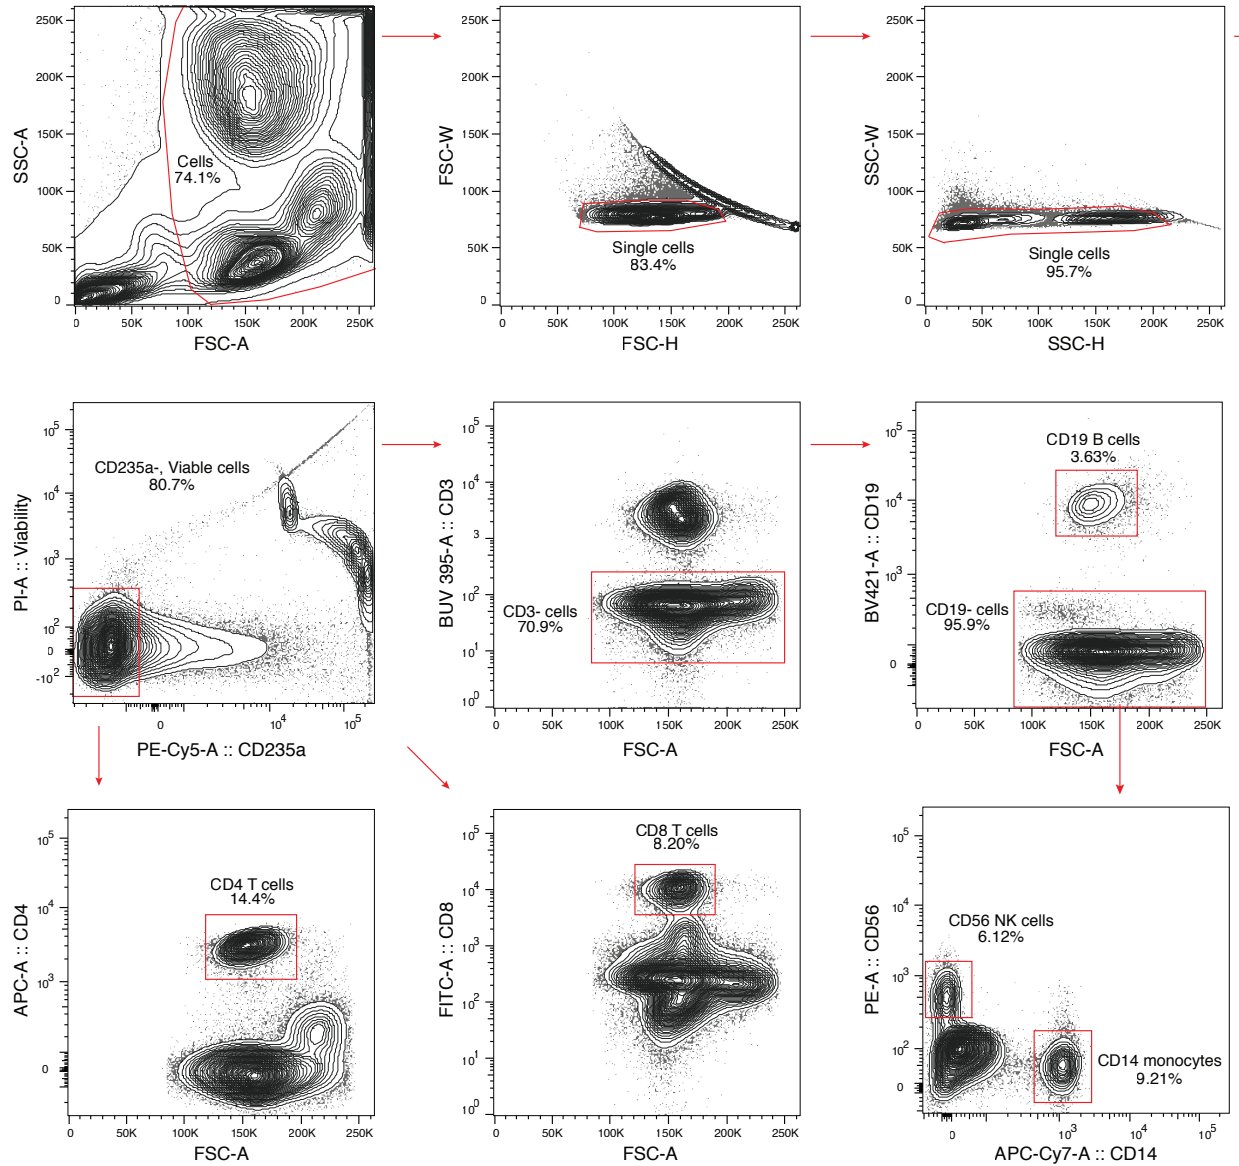

Supplement: NIHMS1624031-supplement-2.pdf [file NIHMS1624031-supplement-2.pdf]
